# Supplementary material
Source: publisher figshare collection journal article supplement (https://tandf.figshare.com/articles/dataset/_/1276462)

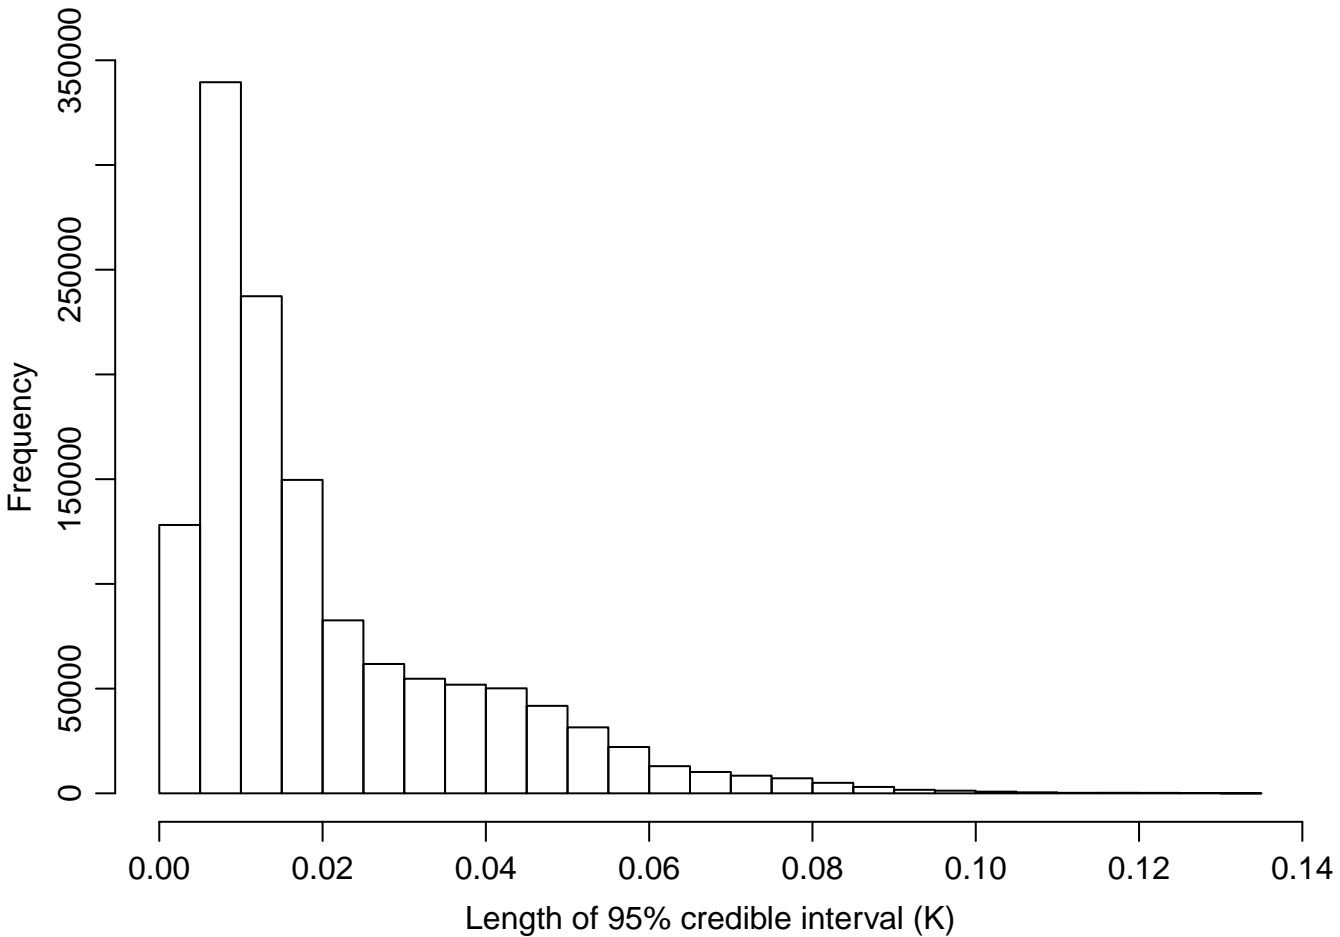

Supplement: Supplementary file 1 [file 1]

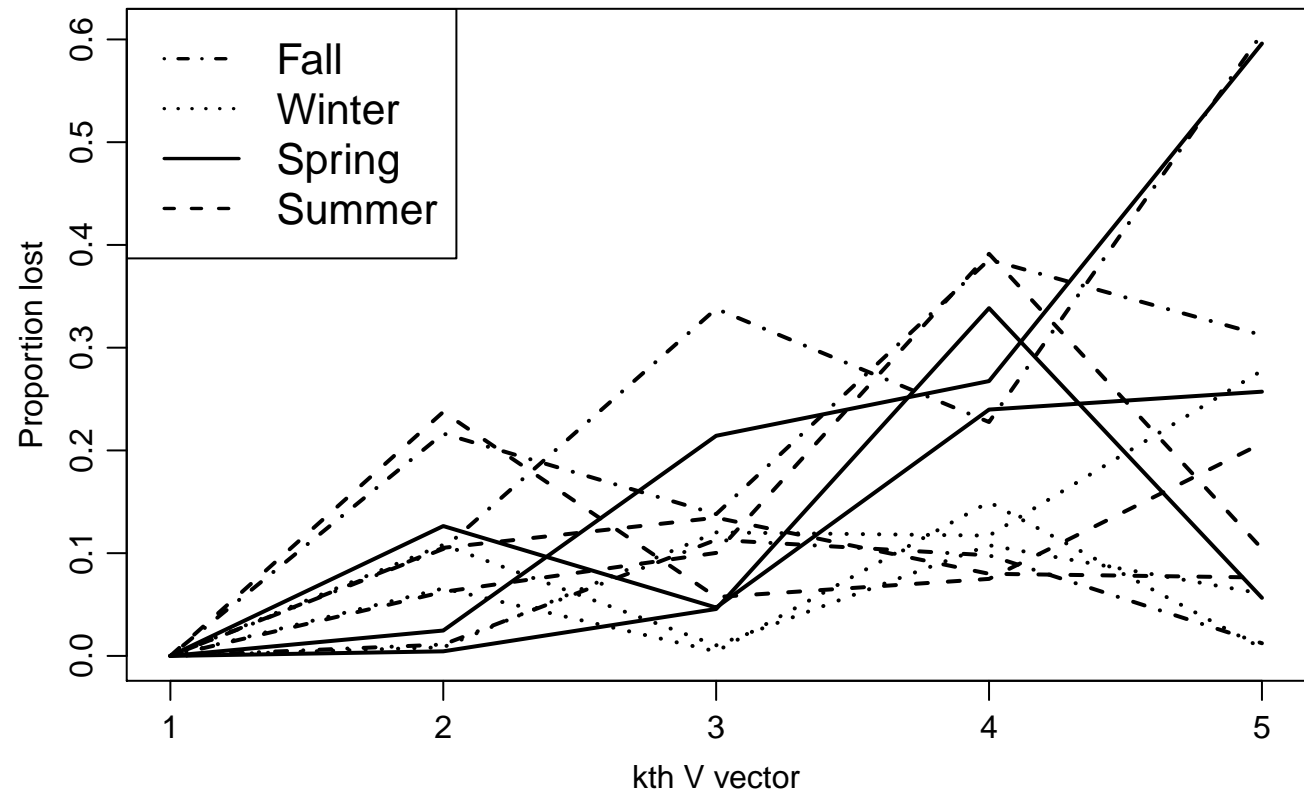

Supplement: Supplementary file 2 [file 1]

**k=1, j=1**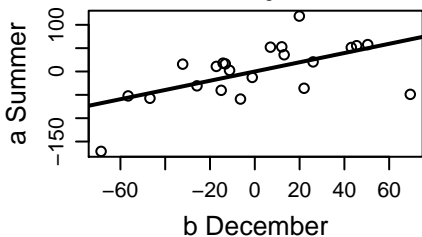**k=2, j=2**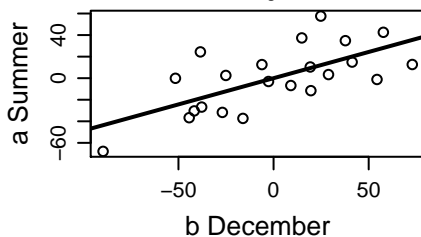**k=3, j=3**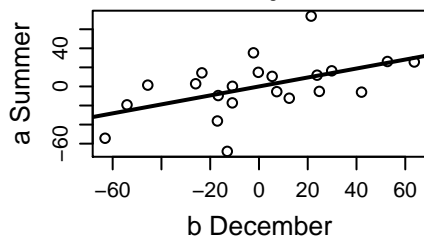**k=1, j=2**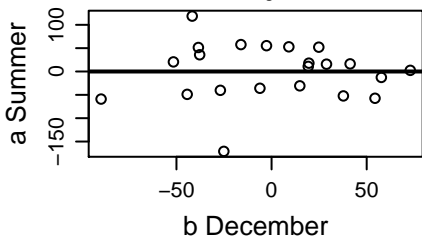**k=2, j=1**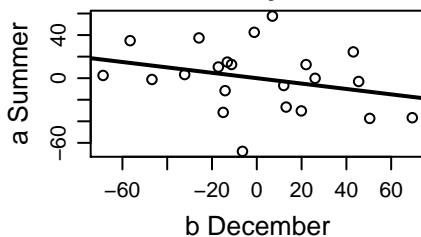**k=2, j=3**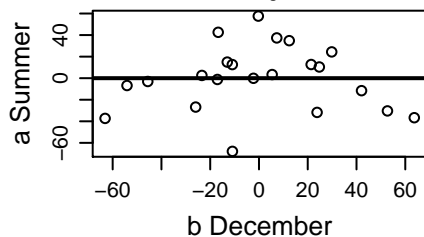

Supplement: Supplementary file 3 [file 1]

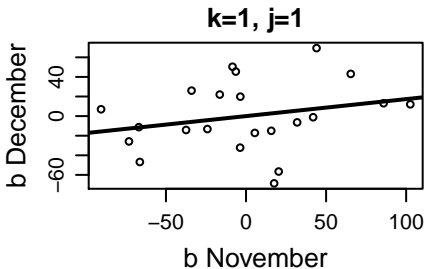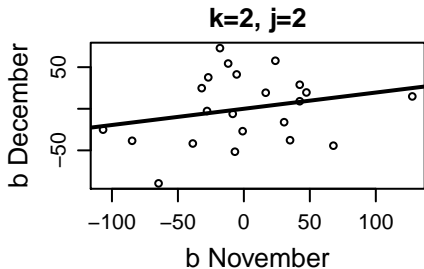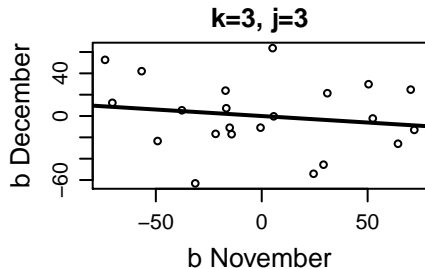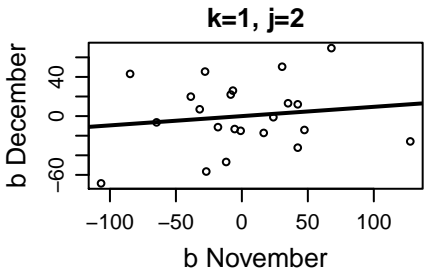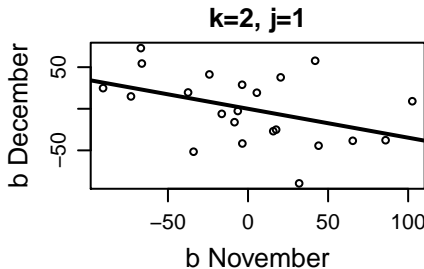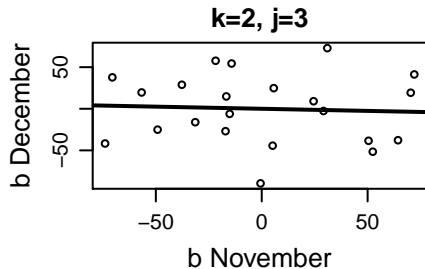

Supplement: Supplementary file 5 [file 1]
